# THE JOURNAL OF NEUROPSYCHIATRY and Clinical Neurosciences

The Official Journal of the American Neuropsychiatric Association

## In this issue:

- The Dynamic Brain:  
Neuroplasticity and Mental Health
- A Video Ethnography Approach  
for Linking Naturalistic Behaviors  
to Research Constructs of  
Neurocognition in Schizophrenia
- Yoga as an Ancillary Treatment  
for Neurological and Psychiatric  
Disorders: A Review
- Olfaction and Cognition in  
Schizophrenia: Sex Matters
- Bilateral Anterior Capsulotomy  
for Intractable Depression
- Neurotherapy of Traumatic Brain  
Injury/Posttraumatic Stress  
Symptoms in OEF/OIF Veterans

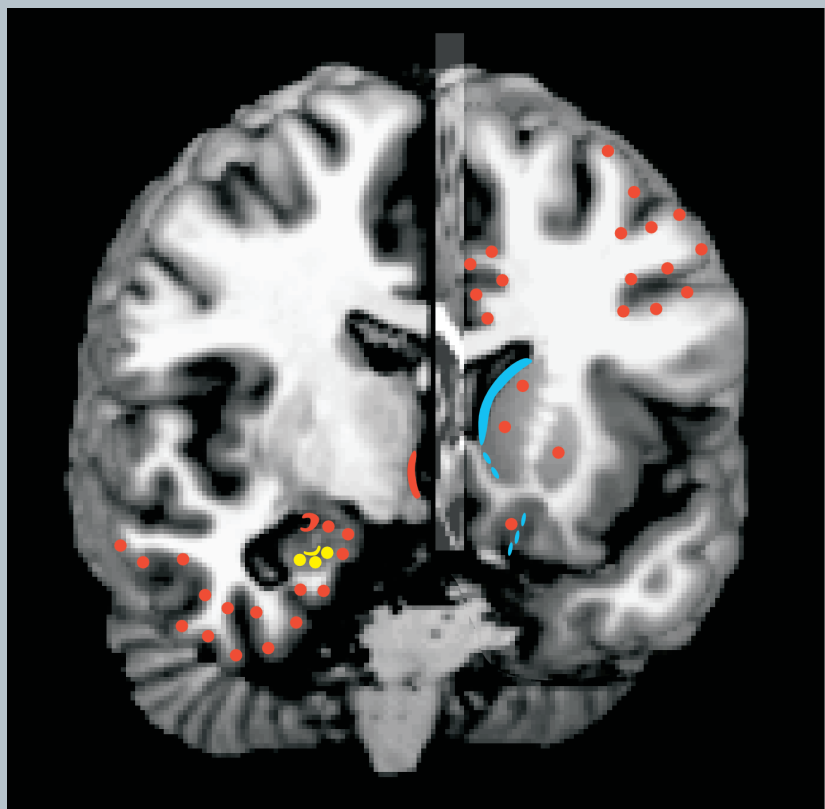

Source: https://psychiatryonline.org/doi/suppl/10.1176/jnp.2012.24.issue-2/suppl_file/cover.pdf
